# Supplementary material for: MTDH promotes metastasis of clear cell renal cell carcinoma by activating SND1-mediated ERK signaling and epithelial-mesenchymal transition
Source: publisher site journal article supplement (doi:10.18632/aging.102694), 2020-01-24
Supplement: Supplementary file [file aging-v12i2-102694-supplementary-material-SD1.pdf]

SUPPLEMENTARY FIGURES

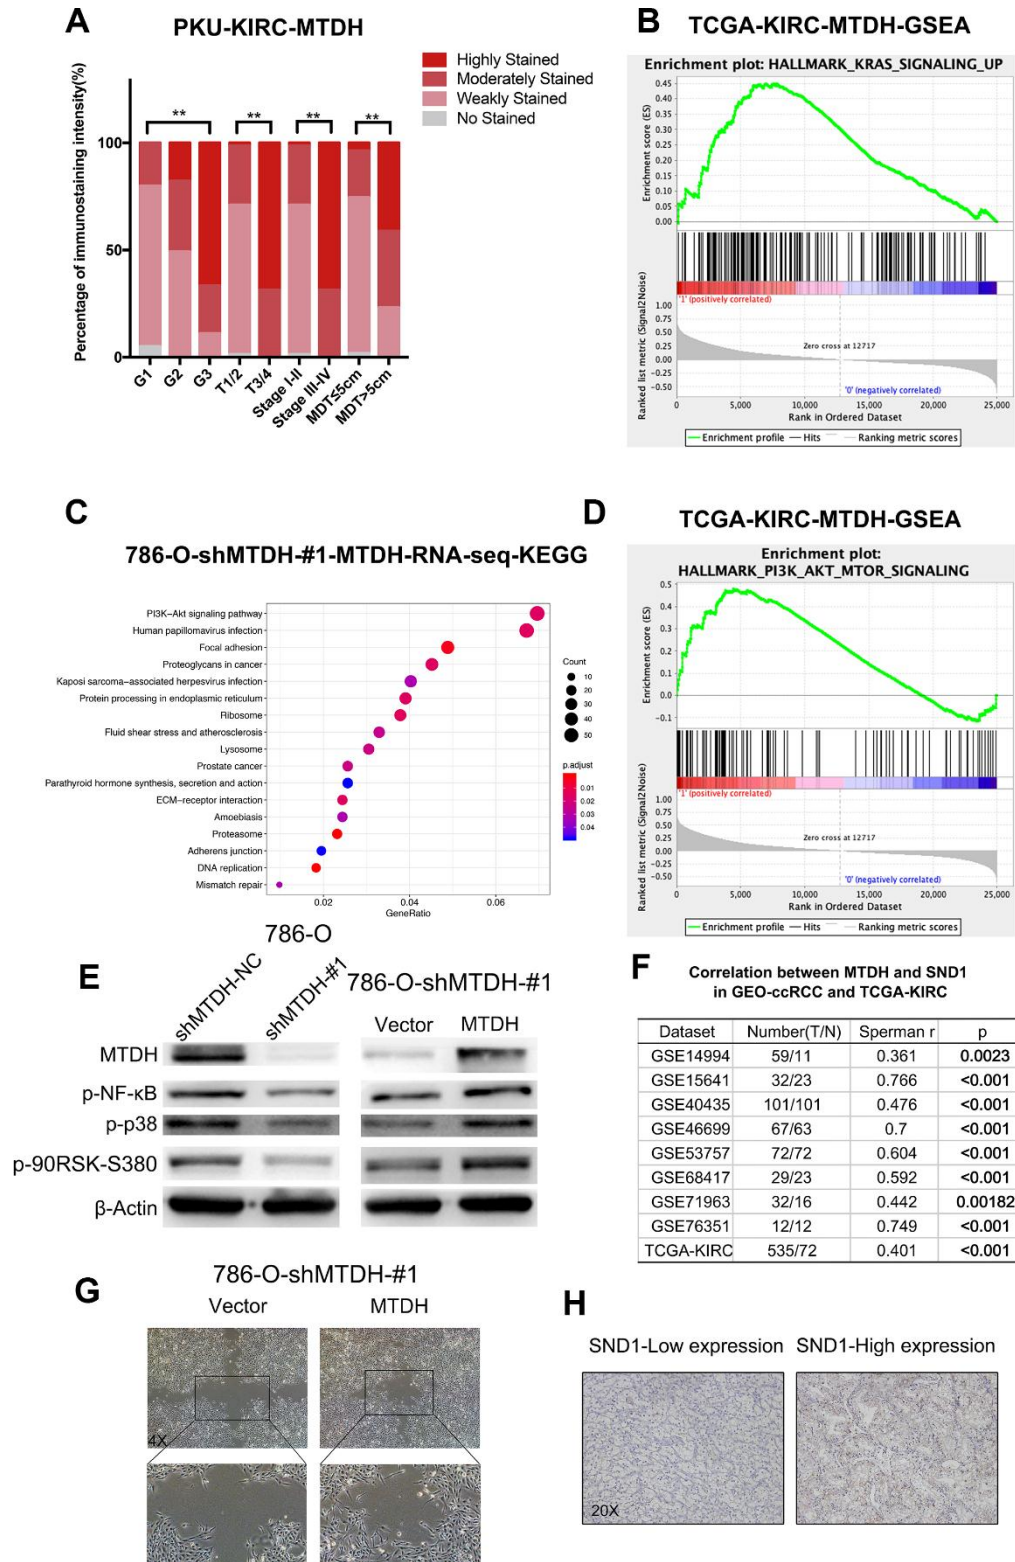

**Supplementary Figure 1. Potential mechanism of tumor oncogenic function of MTDH in ccRCC.** (A) Percentage distribution of MTDH IHC intensity in ccRCC with various clinicopathological features. histologic grade, pathologic T, pathologic stage and MDT. (B) Based on TCGA-KIRC RNA sequencing data, genes influenced by MTDH overexpression were mostly enriched in pathways involved with KRAS signaling

using Gene Set Enrichment Analysis (GSEA) pathway analysis. **(C)** Statistics of KEGG pathway enrichment. The y-axis corresponds to KEGG Pathway, and the x-axis shows the GeneRatio. The color of the dot represents adjusted p value (padj), and the size of the dot represents the number of differentially expressed genes mapped to the reference pathways. **(D)** Based on TCGA-KIRC RNA sequencing data, genes influenced by MTDH overexpression were enriched in pathways involved with PI3K-AKT signaling using Gene Set Enrichment Analysis (GSEA) pathway analysis. **(E)** Western blot assay of p-NF- $\kappa$ B, p-P38 and p-P90RSK expression in MTDH-knockdown 780-O cells and MTDH-overexpressed cells, comparing with control cells. **(F)** A significant positive correlation between MTDH and SND1 was identified (Spearman's correlation  $r$ : 0.361-0.766, all  $p < 0.01$ ) in the eight GEO datasets and TCGA-KIRC dataset. **(G)** compared with control cells, 786-O cells with over-expression of MTDH showed loss of adherent phenotype with decreased intercellular contact and induction of fibroblast like state. **(H)** The representative immunostaining of high and low SND1 expression in ccRCC tissues was shown.

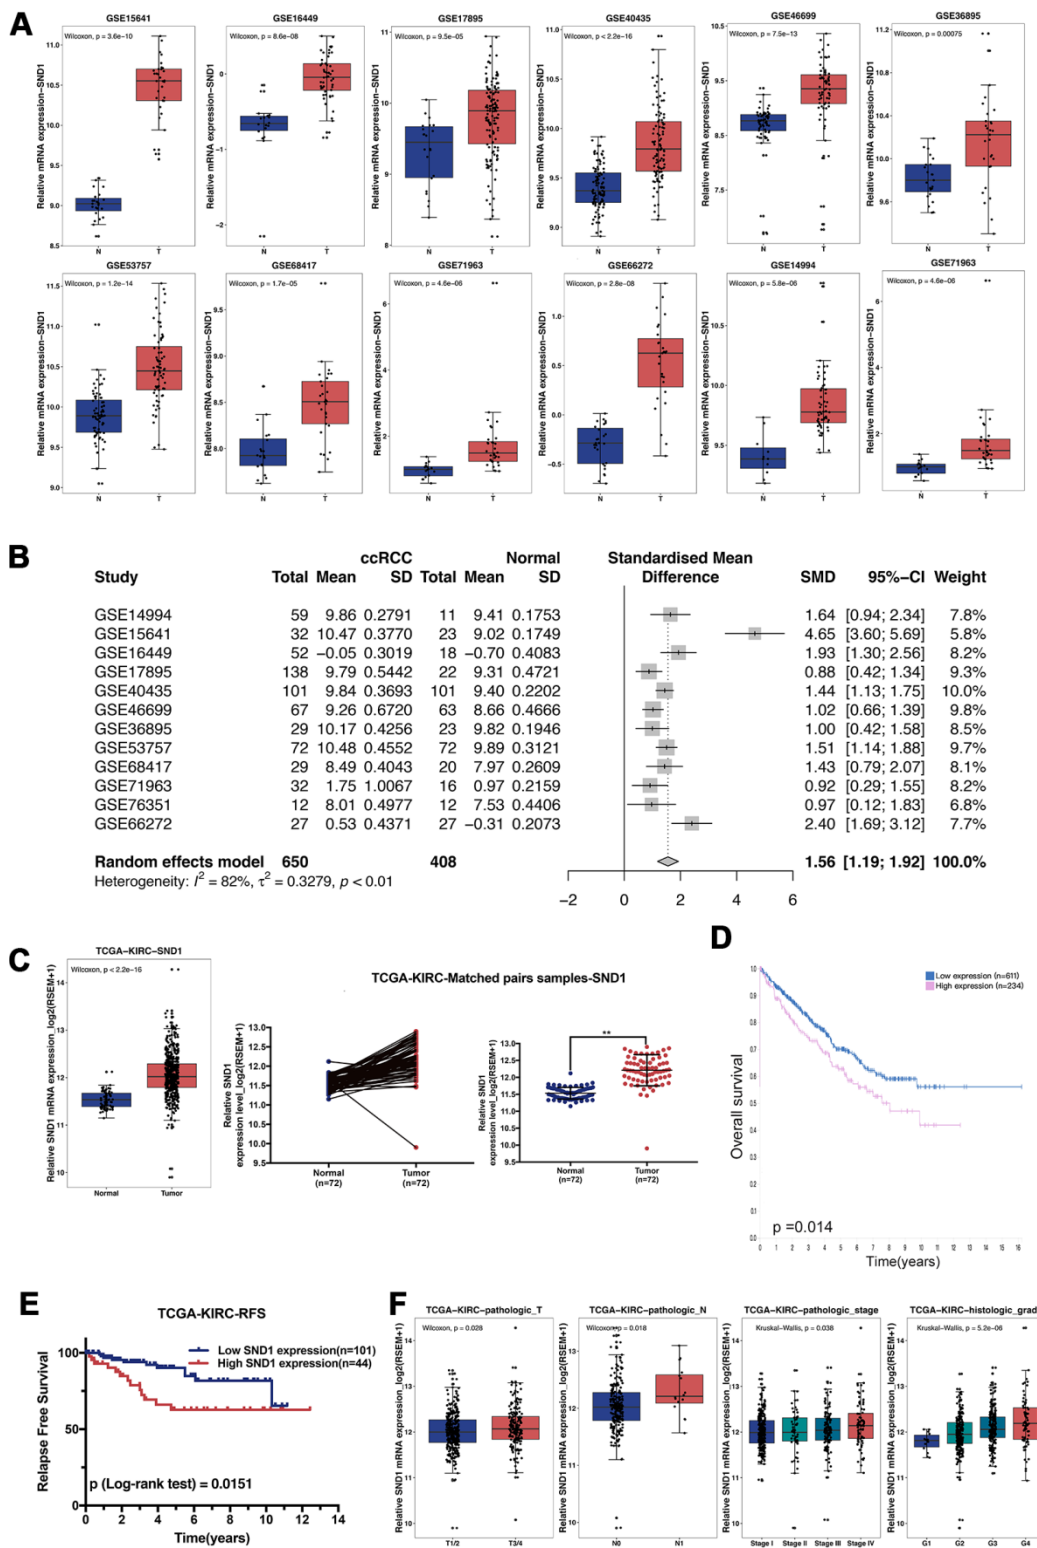

**Supplementary Figure 2. The relative SND1 mRNA expression in ccRCC.** (A) The mRNA expression of SND1 was significantly increased in ccRCC tissues compared with normal kidney tissue in all 12 ccRCC GEO datasets. (B) The result of meta-analysis revealed that SND1 mRNA expression was still obviously upregulated in the GEO union dataset. (C) Compared with matched paracancerous normal kidney tissues, SND1 mRNA expression was increased in TCGA-KIRC dataset. (D) The high SND1 mRNA expression group had a poorer OS than the low SND1 group in TCGA-KIRC dataset based on The Human Protein Atlas website. (E) In TCGA-KIRC dataset, ccRCC patients with high SND1 expression levels had shorter RFS ( $p_{\text{log-rank test}}=0.0151$ ). (F) The SND1 mRNA expression is upregulated in ccRCC patients with higher pathologic T, pathologic N, pathologic stage and histologic grade in TCGA-KIRC dataset.
